# Supplementary material for: Vacuolar H+-ATPase subunits Voa1 and Voa2 cooperatively regulate secretory vesicle acidification, transmitter uptake, and storage
Source: PubMed Central journal article supplement — Mol Biol Cell. 2011 Sep 15;22(18):3394–409. doi: 10.1091/mbc.E11-02-0155 (PMC3172264; doi:10.1091/mbc.e11-02-0155), 2011-09-15
Supplement: supp_E11-02-0155_CombinedSupMats.pdf [file supp_E11-02-0155_CombinedSupMats.pdf]

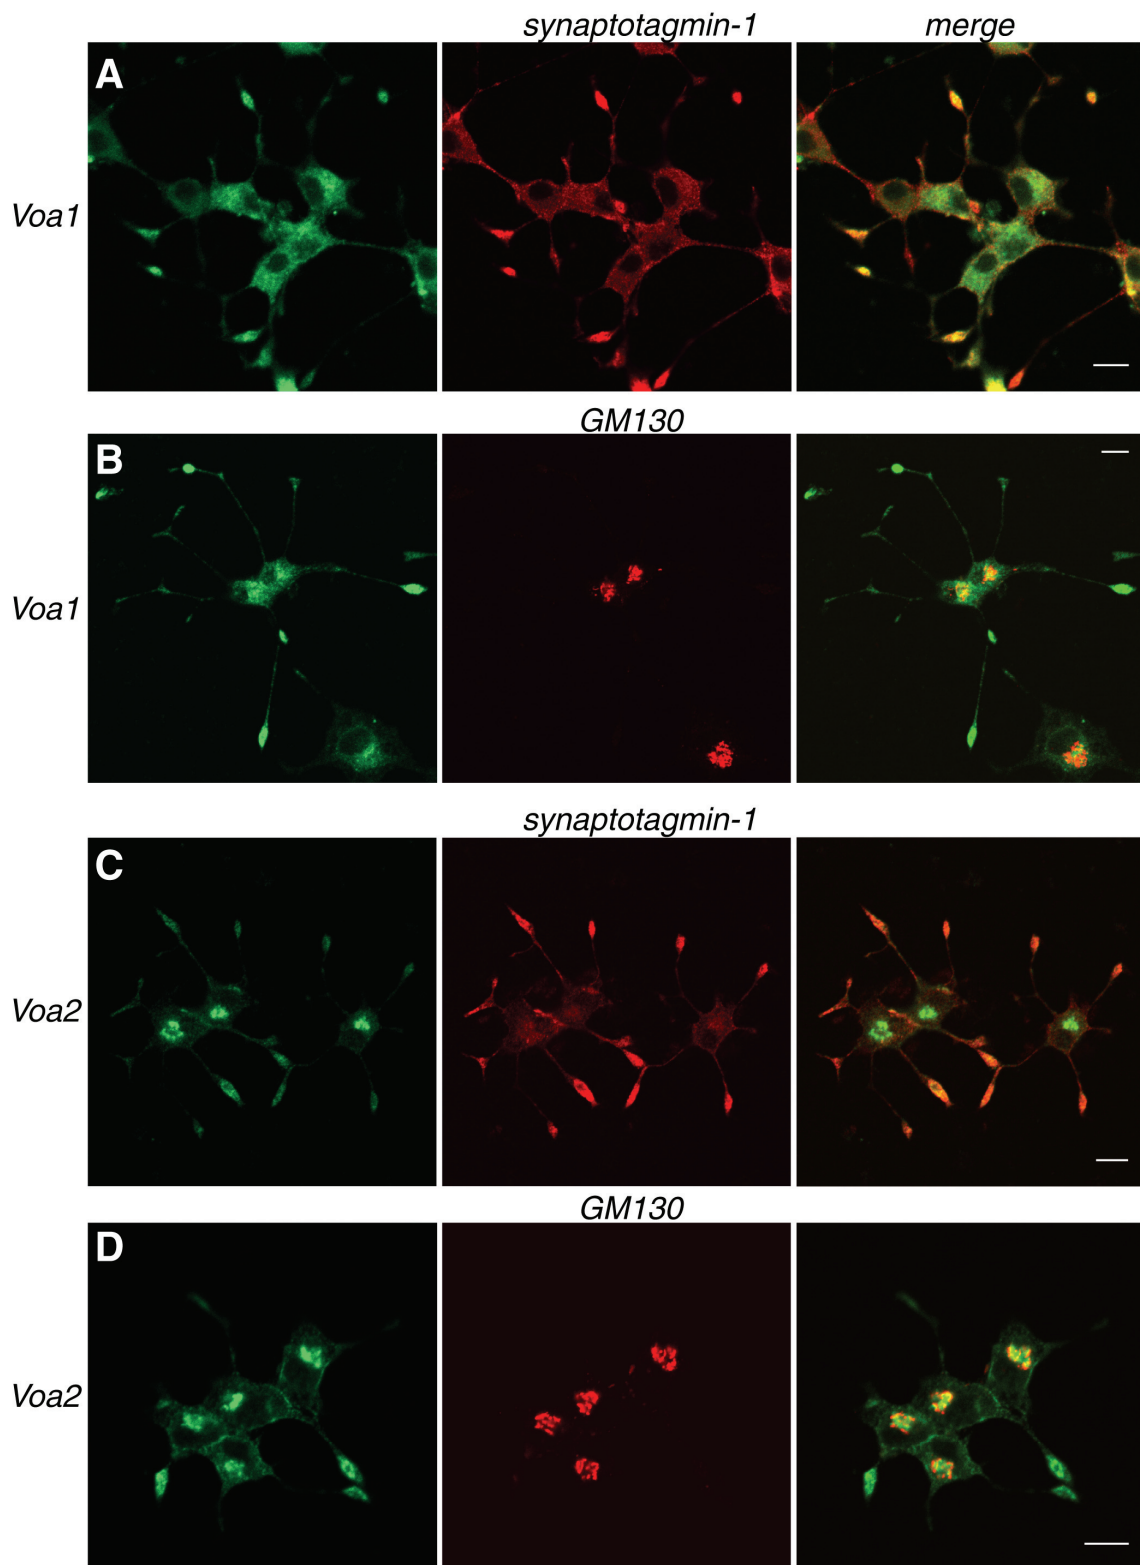

Supplemental Figure 1, Saw et al.

**Supplemental Figure 1. Confocal immunofluorescence microscopy reveals that stably expressed Voa1 better colocalizes with synaptotagmin-1 whereas Voa2 better colocalizes with GM130 in PC12 cells.**

NGF-differentiated PC12 cells that stably express Voa1-EmGFP (A, B) or Voa2-EmGFP (C, D) were co-stained with anti-GFP rabbit polyclonal antibody (all panels) and either anti-synaptotagmin-1 mouse monoclonal antibody (A, C) or anti-GM130 mouse monoclonal antibody (B, D). For secondary staining Alexa 488-conjugated goat anti-rabbit antibody and rhodamine red-x-conjugated goat anti-mouse antibody were used against the appropriate primary antibodies. Right panels are merged pictures. Scale bar = 10  $\mu\text{m}$

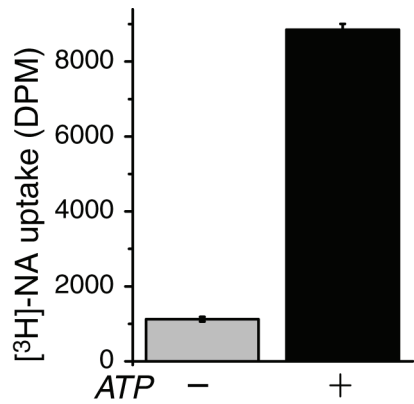

**Supplemental Figure 2. ATP-dependent [<sup>3</sup>H]-NA uptake in PC12 cells.** An example of [<sup>3</sup>H]-NA uptake assays in the presence or absence of 2 mM MgATP using mechanically permeabilized wild-type PC12 cells performed in quadruplicates. The error bars indicate SEM.

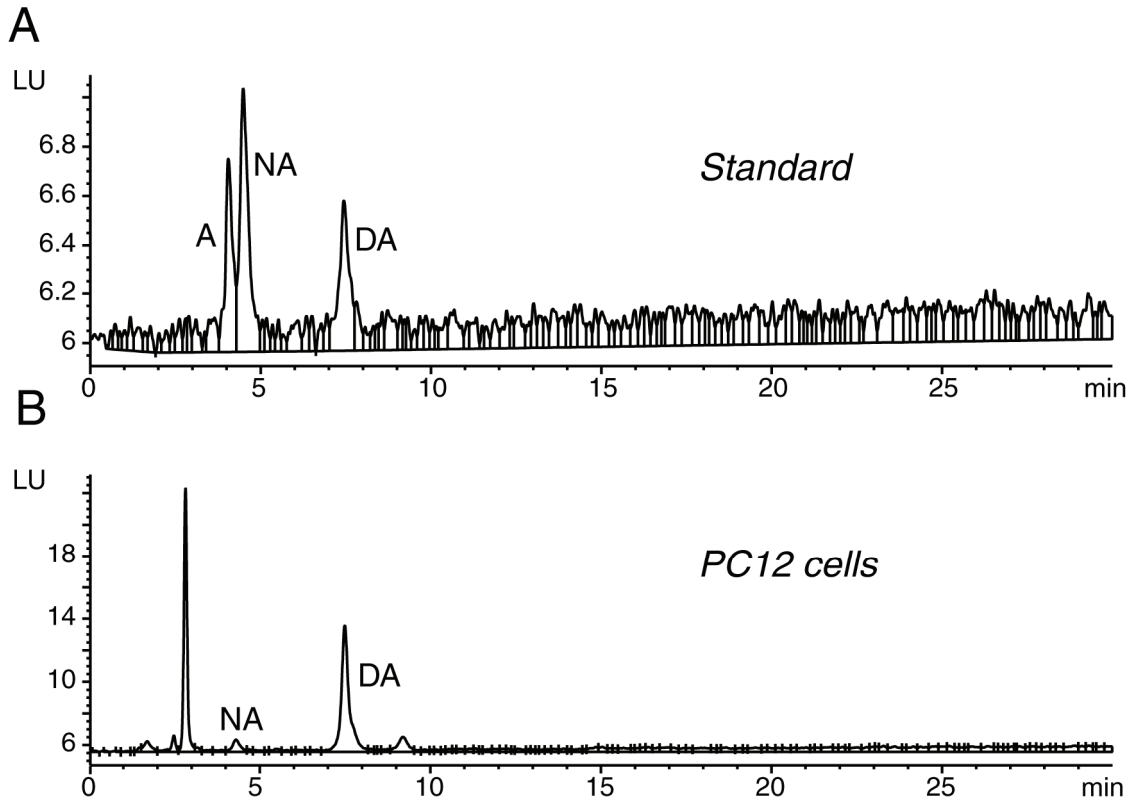

**Supplemental Figure 3. HPLC analysis of catecholamines from standard samples and PC12 cells.** (A) Separation of standard samples (the volume of the injected sample is 10  $\mu$ l, the concentration of catecholamines is 0.25 ng/ $\mu$ l each, A: adrenaline, NA: noradrenaline, DA: dopamine). (B) PC12 cells.

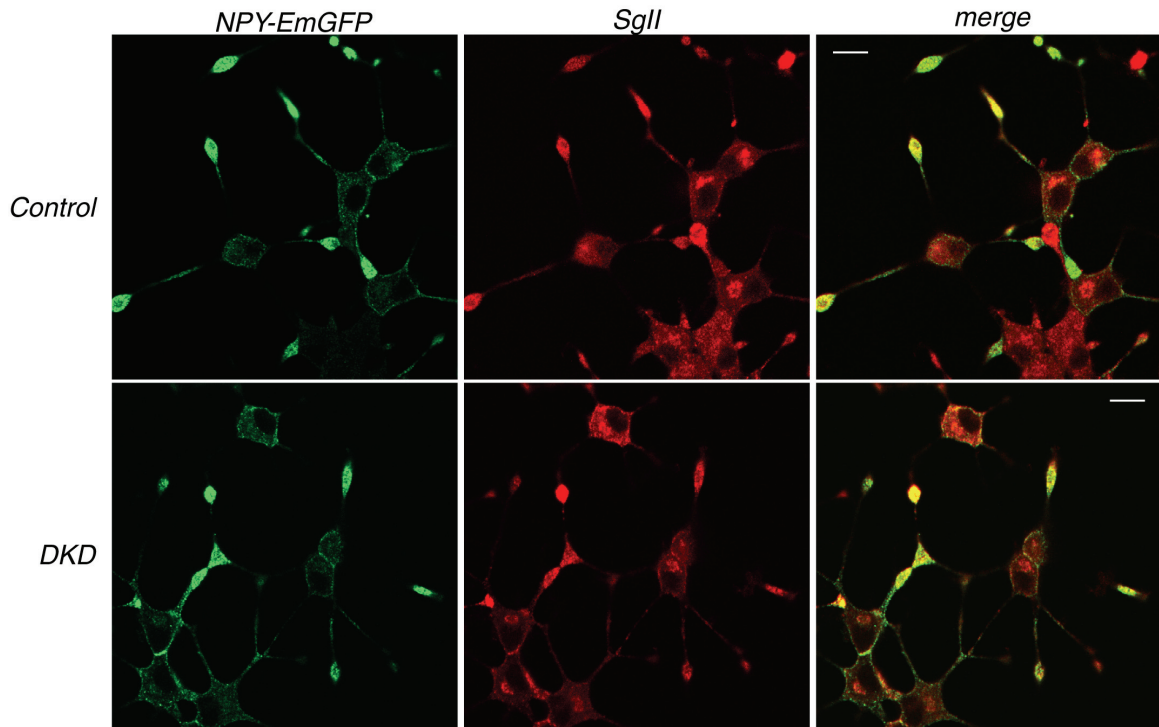

**Supplemental Figure 4. NPY-EmGFP is colocalized with Secretogranin-II, a marker protein of dense-core vesicles.** NGF-differentiated control (upper panels) and Voa1/Voa2 DKD (lower panels) cells that were transfected with NPY-EmGFP with stained with anti-Secretogranin II (SgII) rabbit polyclonal antibody. For secondary staining Alexa 568 conjugated goat anti-rabbit antibody was used. Right panels are merged pictures. Scale bar = 10  $\mu$ m.
